# Supplementary material for: Microfluidic assay for the on-chip electrochemical measurement of cell monolayer permeability
Source: Royal Society of Chemistry journal article supplement (doi:10.1039/c8lc01321g), 2019-01-01
Supplement: c8lc01321g1.pdf [file c8lc01321g1.pdf]

**Electronic Supplementary Information for**

**MICROFLUIDIC ASSAY FOR THE ON-CHIP ELECTROCHEMICAL  
MEASUREMENT OF CELL MONOLAYER PERMEABILITY**

Jeremy F. Wong<sup>a,b</sup>, Craig A. Simmons<sup>a,b,c\*</sup>

<sup>a</sup> Institute of Biomaterials and Biomedical Engineering, University of Toronto, Toronto, ON M5S 3G9, Canada

<sup>b</sup> Translational Biology and Engineering Program, Ted Rogers Centre for Heart Research, Toronto, ON M5G 1M1, Canada

<sup>c</sup> Department of Industrial and Mechanical Engineering, University of Toronto, Toronto, ON M5S 3G8, Canada

\* Corresponding author: Craig A. Simmons. E-mail: c.simmons@utoronto.ca. Telephone: 1-416-946-0548. Address: U of T Translational Biology & Engineering Program, Ted Rogers Centre for Heart Research, MaRS West Tower, 661 University Avenue, 14th Floor, Toronto, Ontario M5G 1M1 Canada.

## SUPPLEMENTARY FIGURES

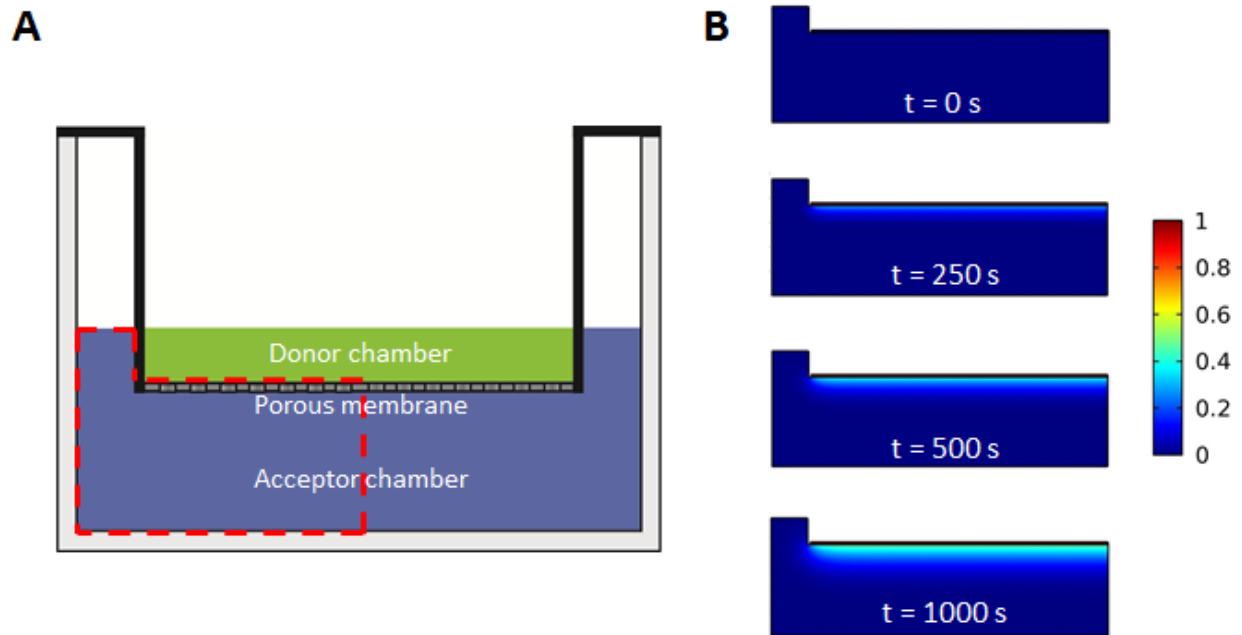

**Fig.S1** Computational model of fluorescein transport in a 6-well Transwell system. A) Schematic of the 6-well Transwell geometry and the numerically simulated portion (dashed red outline). B) Normalized concentration profiles at selected time points in the Transwell system. Mass transport was assumed to be invariant around the central vertical axis. Physical dimensions of the model were based on manufacturer specifications and the volume of solution used in the permeability experiments. The concentration of fluorescein in the donor chamber was assumed to be much greater than the concentration in the acceptor chamber and thus remained constant. Diffusive permeability was calculated by integrating the fluorescein concentration in the acceptor chamber at a given time point to obtain the fluorescein flux across the porous membrane support.

| Parameter                                                                  | Value                     | Reference               |
|----------------------------------------------------------------------------|---------------------------|-------------------------|
| Falcon 1.0 $\mu\text{m}$ pore PET cell culture insert<br>(Cat. No. 353102) |                           |                         |
| Pore density (pore $\text{cm}^{-2}$ )                                      | $1.6 \pm 0.6 \times 10^6$ | (Corning, 2016)         |
| Porosity                                                                   | 0.0126                    |                         |
| Darcy permeability ( $\text{m}^2$ )                                        | $3.93 \times 10^{-16}$    |                         |
| Thickness ( $\mu\text{m}$ )                                                | 10                        | (Corning, 2016)         |
| MB concentration ( $\mu\text{M}$ )                                         | 40                        |                         |
| MB diffusion coefficient ( $\text{m}^2 \text{s}^{-1}$ )                    | $4.6 \times 10^{-10}$     | (Miložič et al., 2014)  |
| RuHex concentration ( $\mu\text{M}$ )                                      | 200                       |                         |
| RuHex diffusion coefficient ( $\text{m}^2 \text{s}^{-1}$ )                 | $8.42 \times 10^{-10}$    | (Wang et al., 2011)     |
| Fluorescein concentration ( $\mu\text{M}$ )                                | 0.1                       |                         |
| Fluorescein diffusion coefficient ( $\text{m}^2 \text{s}^{-1}$ )           | $4.2 \times 10^{-10}$     | (Casalini et al., 2011) |

**Table S1** Computational model parameters for electroactive or fluorescent tracer transport simulations.

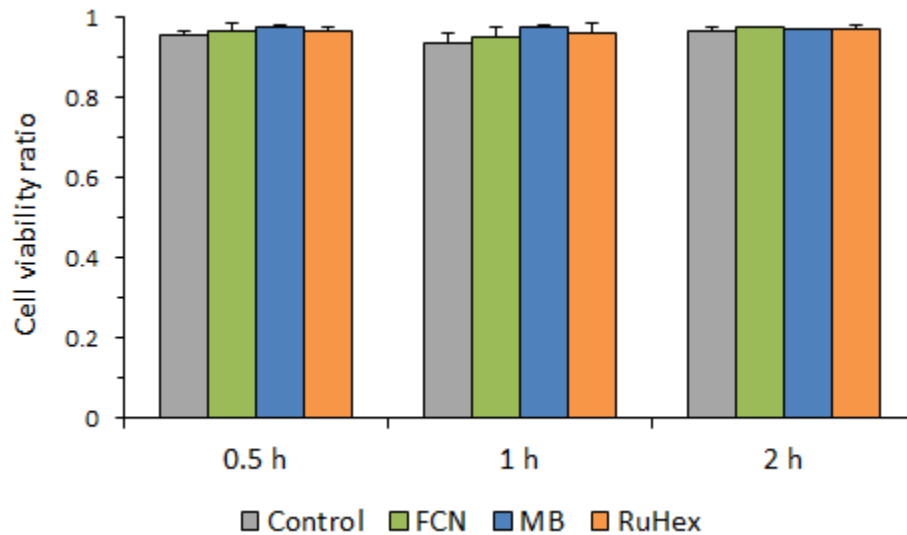

**Fig.S2** Fraction of viable cells relative to the total number of cells (viable + dead) after treatment with different electroactive tracers. The cell viability ratio was  $> 0.94$  across all conditions.  $n \geq 3$  for all treatments and timepoints except for FCN at 2 h where  $n = 1$ .

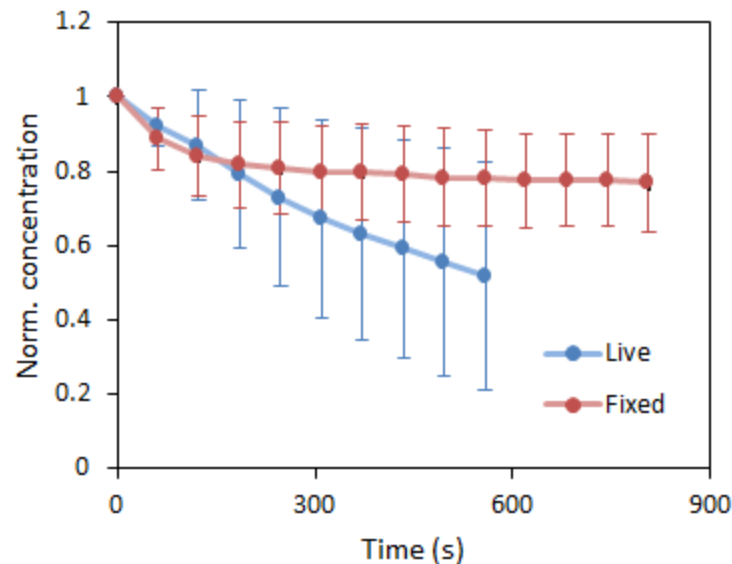

**Fig.S3** MB electrochemical signal over time in the presence of a live PAEC monolayer and fixed (dead) PAEC monolayer. The electrochemical signal decreases continually and rapidly in the presence of live cells whereas the signal stabilizes in magnitude when these same cells are no longer active, a strong indication that MB is reduced by living endothelial cells.

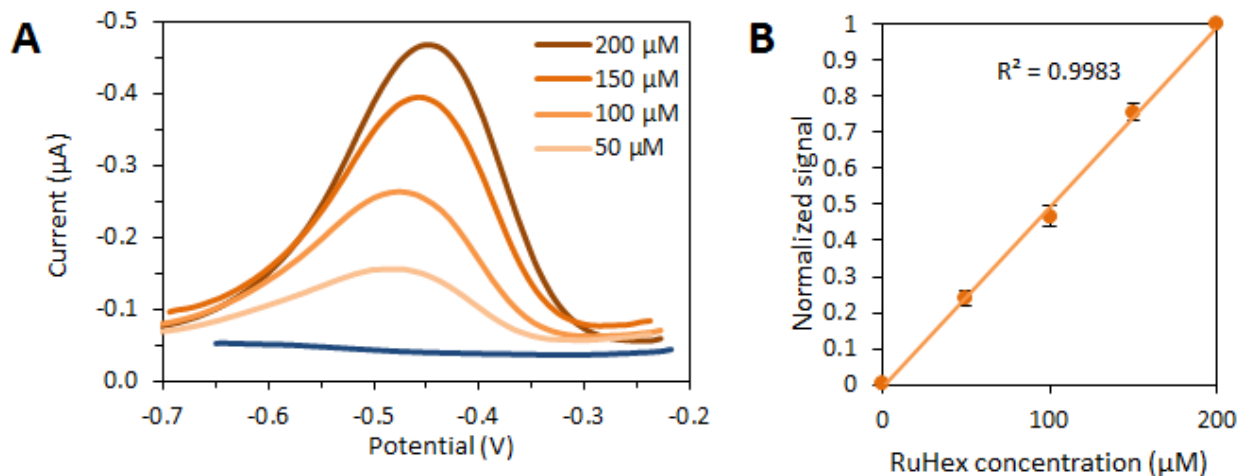

**Fig.S4** A) Sample SWV scans at different concentrations of RuHex measured using the integrated electrodes in the bilayer microfluidic device. The peak current increases as the concentration of RuHex increases. The blue curve represents a blank scan. B) Standard curve. A strong linear correlation was found between the normalized peak current and RuHex concentration.

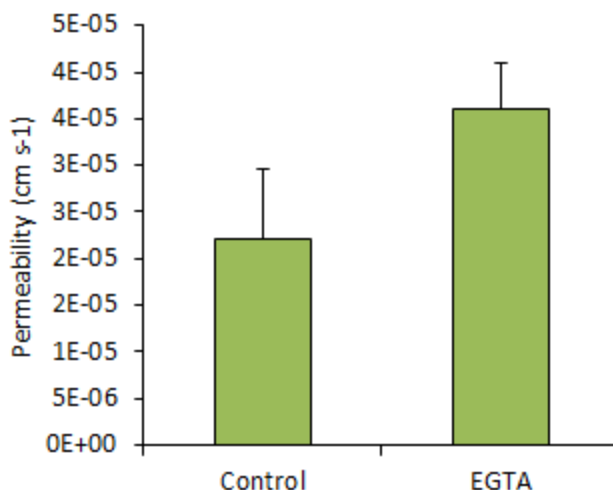

**Fig.S5** PAEC monolayer permeability to fluorescein as measured by a Transwell assay.

## REFERENCES

- Casalini, T., Salvalaglio, M., Perale, G., Masi, M., Cavallotti, C., 2011. Diffusion and aggregation of sodium fluorescein in aqueous solutions. *J. Phys. Chem. B* 115, 12896–12904. doi:10.1021/jp207459k
- Corning, 2016. Permeable Supports Selection Guide [WWW Document]. URL [http://www.corning.com/catalog/cls/documents/selection-guides/Selection\\_Guide\\_CLS-CC-027\\_Permeable\\_Supports.pdf](http://www.corning.com/catalog/cls/documents/selection-guides/Selection_Guide_CLS-CC-027_Permeable_Supports.pdf) (accessed 8.20.11).
- Miložič, N., Lubej, M., Novak, U., Žnidaršič-Plazl, P., Plazl, I., 2014. Evaluation of Diffusion Coefficient Determination using a Microfluidic Device. *Chem. Biochem. Eng. Q. J.* 28, 215–223. doi:10.15255/CABEQ.2014.1938
- Wang, Y., Limon-Petersen, J.G., Compton, R.G., 2011. Measurement of the diffusion coefficients of [Ru(NH<sub>3</sub>)<sub>6</sub>]<sup>3+</sup> and [Ru(NH<sub>3</sub>)<sub>6</sub>]<sup>2+</sup> in aqueous solution using microelectrode double potential step chronoamperometry. *J. Electroanal. Chem.* 652, 13–17. doi:10.1016/j.jelechem.2010.12.011
